# Supplementary figures and images for: An Immunity-Associated lncRNA Signature for Predicting Prognosis in Gastric Adenocarcinoma
Source: Hindawi journal article supplement (doi:10.1155/2022/3035073), 2022-04-25

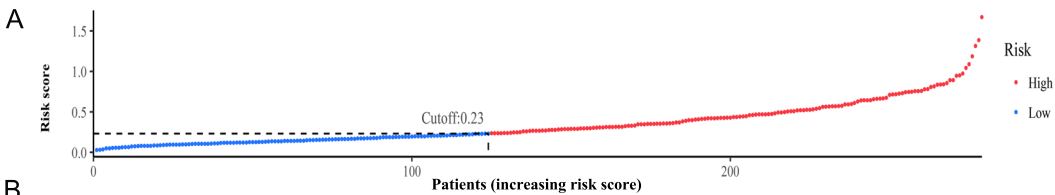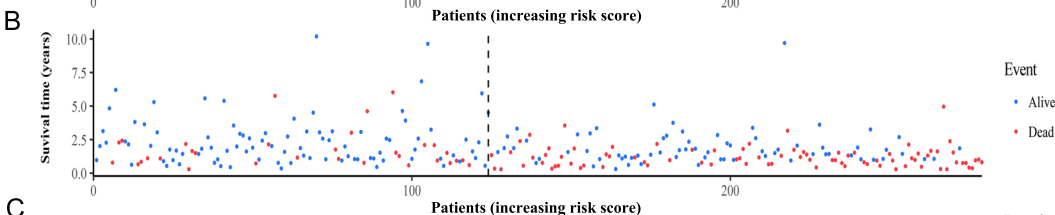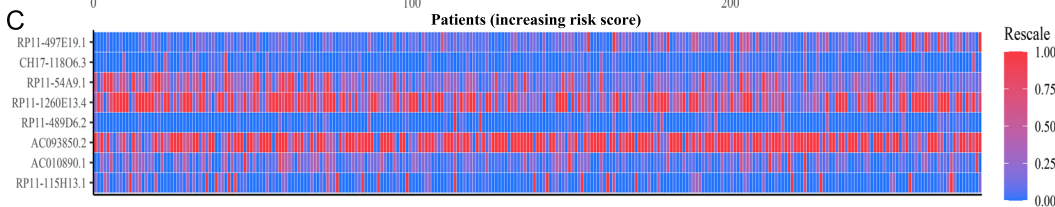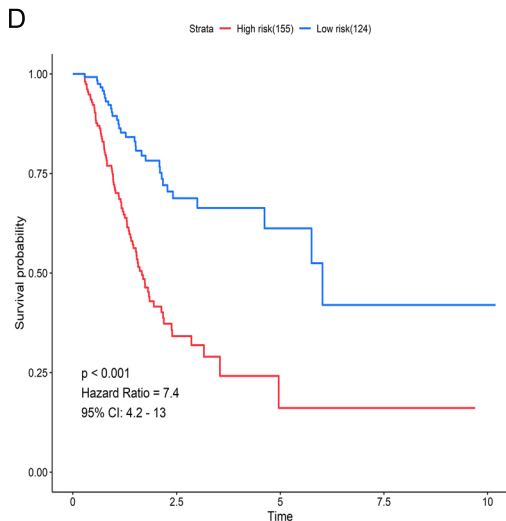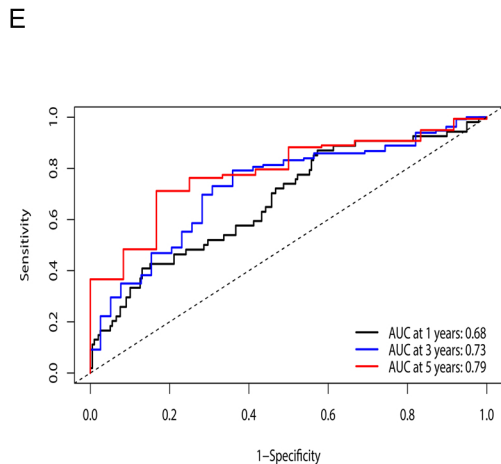

Supplement: f1 [file 3035073.f1.zip]

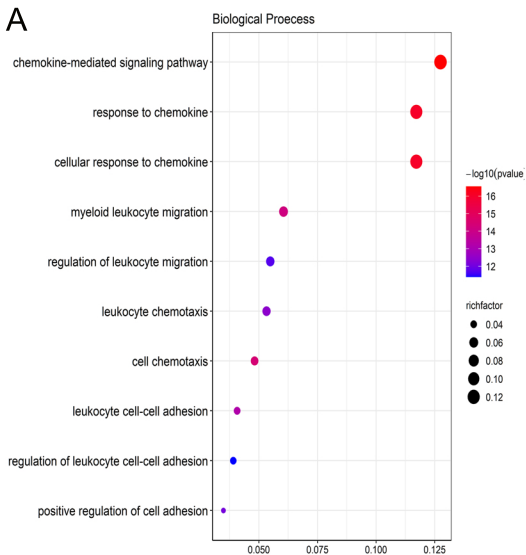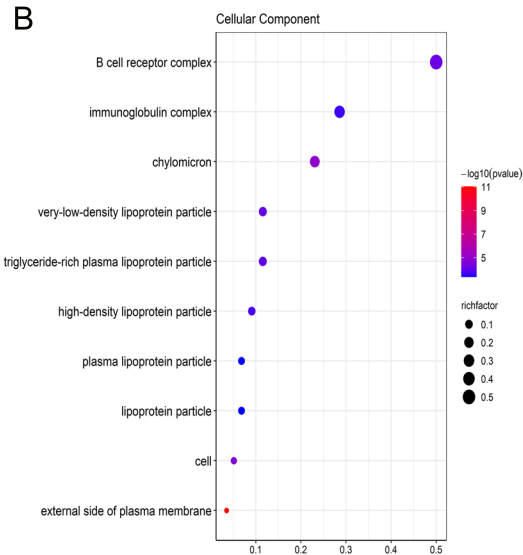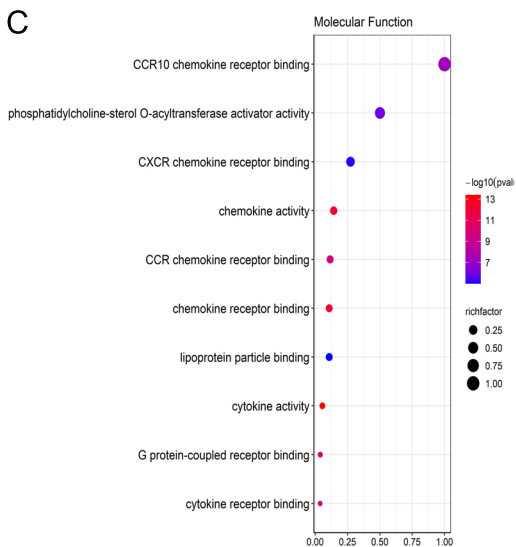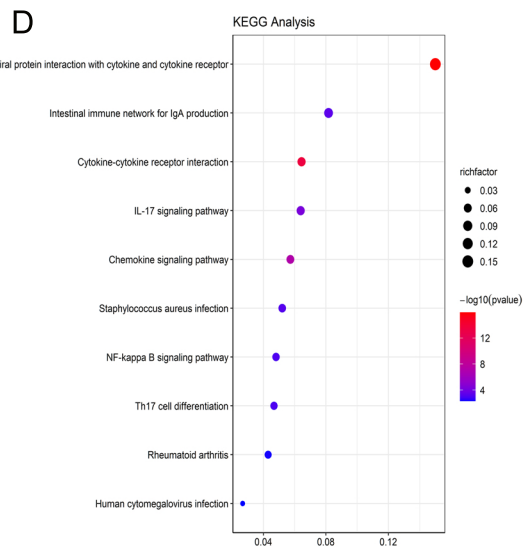

Supplement: f1 [file 3035073.f1.zip]

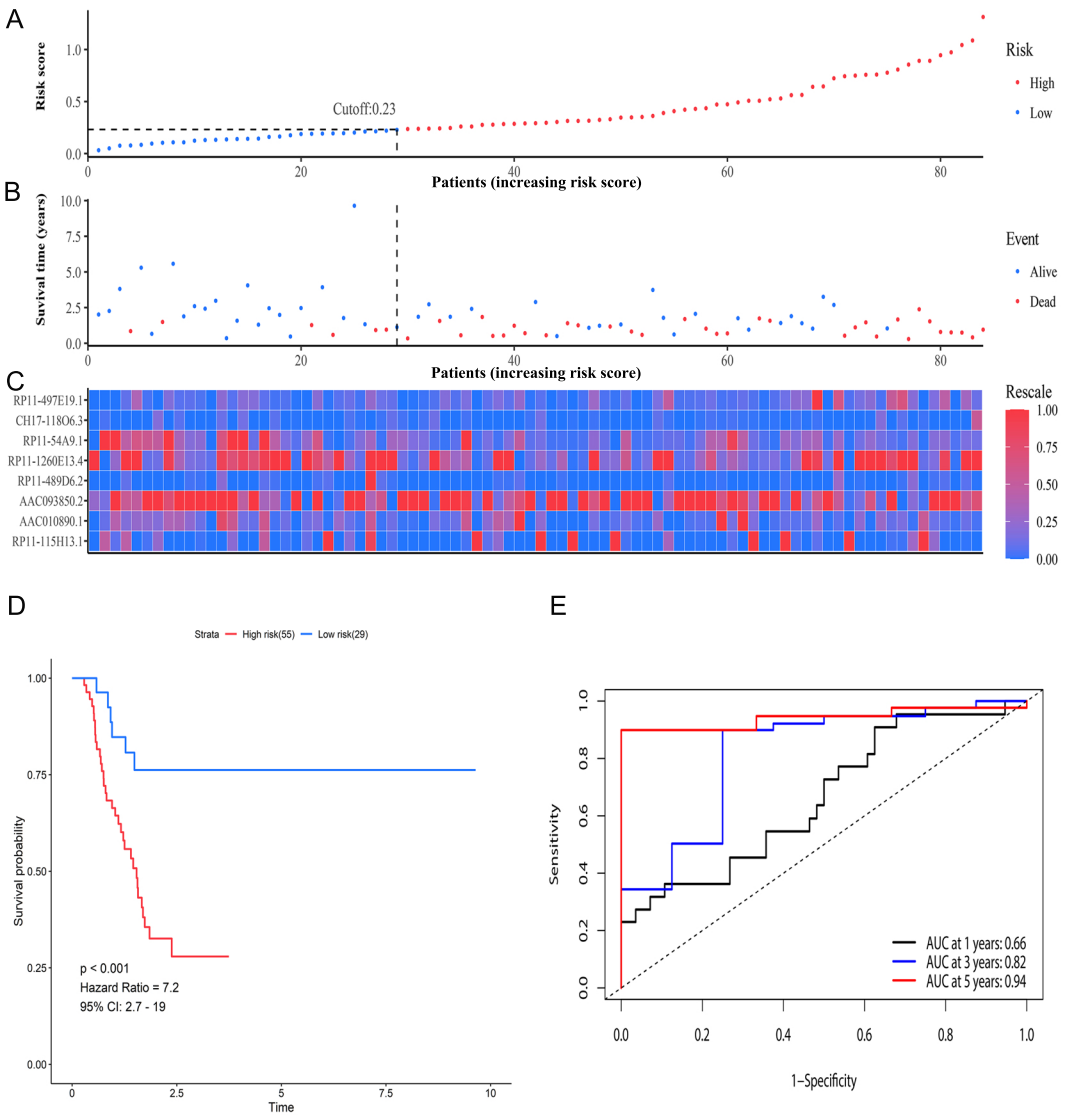

Supplement: f1 [file 3035073.f1.zip]
